# Supplementary material for: Hedonic Signals in Crowdfunding
Source: Springer Nature journal article supplement (doi:10.1007/s12599-024-00854-x), 2024-02-12
Supplement: MOESM1 [file 26727746]

# **Hedonic Signals in Crowdfunding**

## **A Comparison Across Crowdfunding Platform Types**

**Ivo Blohm, Moritz Schulz, Jan Marco Leimeister**

Business & Information Systems Engineering (2024)

**Appendix (available online via <http://link.springer.com>)**

## Online Appendix

### Online Appendix 1. Crowdfunding Projects.

**Table A1.** Examined Crowdfunding Projects.

| <b>Project Title</b>                                  | <b>Platform</b> | <b>Funding</b> | <b>Selection</b> |
|-------------------------------------------------------|-----------------|----------------|------------------|
| TriviaTunes                                           | Appbackr        | 1              | F                |
| refresh.me                                            | Appbackr        | 1              | R                |
| Diet Watchers Diary                                   | Appbackr        | 1              | T                |
| Lightspeed Getaway - Outer Space Police Chase         | Appbackr        | 0              | F                |
| Crane & Rigger – iPad                                 | Appbackr        | 0              | R                |
| Choose My Food                                        | Appbackr        | 0              | T                |
| The New Trade                                         | Appsfinder      | 1              | F                |
| myShopi                                               | Appsfinder      | 1              | R                |
| Suspended coffees                                     | Appsfinder      | 1              | T                |
| The Smoothie Channel                                  | Appsfinder      | 0              | F                |
| From 1 To 10                                          | Appsfinder      | 0              | R                |
| Farm Maker                                            | Appsfinder      | 0              | T                |
| medeor: medizinische Hilfe für Erdbebenopfer          | Betterplace     | 1              | F                |
| Gesundes Essen für die Kinder in Pengo                | Betterplace     | 1              | R                |
| Food for Education                                    | Betterplace     | 1              | T                |
| Education for Impoverished Children                   | Betterplace     | 0              | F                |
| The Upinde Centre for Abandoned Babies                | Betterplace     | 0              | R                |
| Hungry Poor Orphan Kinder                             | Betterplace     | 0              | T                |
| RaterAgent                                            | Crowdcube       | 1              | F                |
| Wrap it Up                                            | Crowdcube       | 1              | R                |
| INEED                                                 | Crowdcube       | 1              | T                |
| Road Ahead (UK) Ltd                                   | Crowdcube       | 0              | F                |
| Plant Pot Plus Ltd                                    | Crowdcube       | 0              | R                |
| Barefoot Foods Ltd                                    | Crowdcube       | 0              | T                |
| Snact.                                                | Crowdfunder     | 1              | F                |
| Newcastle University Boat Club Row to Africa          | Crowdfunder     | 1              | R                |
| SDLP Foyle Westminster Election Campaign              | Crowdfunder     | 1              | T                |
| Help elect a UKIP Mpon on May 7th 2015                | Crowdfunder     | 0              | F                |
| Rising - Rising the Volume                            | Crowdfunder     | 0              | R                |
| ZO MY wear & share                                    | Crowdfunder     | 0              | T                |
| About Face! A Hammock and a Beach...                  | DreamBank       | 1              | F                |
| Antoni Szymczak Fund                                  | DreamBank       | 1              | R                |
| Mackenzie/Berdusco Wedding                            | DreamBank       | 1              | T                |
| Dog Adoption                                          | DreamBank       | 0              | F                |
| iPad Mini                                             | DreamBank       | 0              | R                |
| My Dream is to Help                                   | DreamBank       | 0              | T                |
| Ledora. Einfach hell, überraschend wirtschaftlich     | Econeers        | 1              | F                |
| DZ4. Mein Dach. Mein Strom. Meine Energiewende        | Econeers        | 1              | R                |
| Tiefenschwarz. Nachhaltiger Biomasse-Reaktor          | Econeers        | 1              | T                |
| Miller Waldenenergie. Ihre Grünanlage in Paraguay     | Econeers        | 0              | F                |
| Biogas Dannemann. Bewährte Technologie optimal nutzen | Econeers        | 0              | R                |
| LCB Benneckenstein. Wir bringen Strom in die Stadt    | Econeers        | 0              | T                |
| Mormor Magdas Glass                                   | FundedByMe      | 1              | F                |
| Safello                                               | FundedByMe      | 1              | R                |
| ParkingList - Shared Parking and more                 | FundedByMe      | 1              | T                |
| Corp Wars - Connected, cross-genre games              | FundedByMe      | 0              | F                |
| Hubro Education                                       | FundedByMe      | 0              | R                |
| Telemotix - Pay-as-you-drive insurance                | FundedByMe      | 0              | T                |
| Hurricane Sandy Disaster Relief Fund                  | Fundly          | 1              | F                |
| TransForm's Cap-And-Trade Campaign                    | Fundly          | 1              | R                |
| The Super Local Food Project                          | Fundly          | 1              | T                |
| HELP The Amey Family Recover From A Fire Disaster     | Fundly          | 0              | F                |

| <b>Project Title</b>                                                    | <b>Platform</b> | <b>Funding</b> | <b>Selection</b> |
|-------------------------------------------------------------------------|-----------------|----------------|------------------|
| Blue Ocean Music Fest                                                   | Fundly          | 0              | R                |
| Miss DIVA 2013 - Proceeds To Be Given To RCD Food Pantry                | Fundly          | 0              | T                |
| ShareCraft 2012 - Save the Children East Africa                         | Fundrazr        | 1              | F                |
| Ride to Give - Ironman Canada for Hawk                                  | Fundrazr        | 1              | R                |
| Help a family of beavers in Mission BC                                  | Fundrazr        | 1              | T                |
| Help me improve education in Tanzania!                                  | Fundrazr        | 0              | F                |
| Maria's LEJOG Ride for Well Women Centre                                | Fundrazr        | 0              | R                |
| Samantha's Feline Food Bank                                             | Fundrazr        | 0              | T                |
| Creating Girl Readers in Guatemala                                      | GlobalGiving    | 1              | F                |
| Education For Rural Amazon Communities                                  | GlobalGiving    | 1              | R                |
| Build A Kitchen In Cambodia That Feeds 800 Daily                        | GlobalGiving    | 1              | T                |
| Onetime Grant To Start 50 Vegetable & Fruit Vendor                      | GlobalGiving    | 0              | F                |
| Cancer Children Need Hospital Rooms In Nicaragua                        | GlobalGiving    | 0              | R                |
| Help Feed Thousands Of Refugees In Ethiopia                             | GlobalGiving    | 0              | T                |
| Flow Hive: Honey on Tap Directly from Your Beehive                      | Indiegogo       | 1              | F                |
| Oomi Smart Home. Redefined                                              | Indiegogo       | 1              | R                |
| Borderlands: Singing Through the Prison Walls                           | Indiegogo       | 1              | T                |
| Titanic: Honor and Glory - Phase 3                                      | Indiegogo       | 0              | F                |
| Meet Ember: The Worlds first Adventure Doll                             | Indiegogo       | 0              | R                |
| Melle Mad-Wedge!!!                                                      | Indiegogo       | 0              | T                |
| Pebble: E-Paper Watch for iPhone and Android                            | Kickstarter     | 1              | F                |
| Pack of Heroes - A Vintage Comic Superhero Card Game!                   | Kickstarter     | 1              | R                |
| The Hang Over Soap and Beverage Holder                                  | Kickstarter     | 1              | T                |
| Shell Shock                                                             | Kickstarter     | 0              | F                |
| Aspergers in The Mirror                                                 | Kickstarter     | 0              | R                |
| RoRo's Baking Company ~ All Natural ~ Handmade With Love                | Kickstarter     | 0              | T                |
| Extra Credits                                                           | RocketHub       | 1              | F                |
| Everything Will Be Okay - An Epic Documentary about ALS                 | RocketHub       | 1              | R                |
| Chop!                                                                   | RocketHub       | 1              | T                |
| the information party                                                   | RocketHub       | 0              | F                |
| Support Maker House, the World's First Artisan-driven Makerspace        | RocketHub       | 0              | R                |
| The Queens' Tea Startup Campaign: There's a Queen in Everyone           | RocketHub       | 0              | T                |
| AOTERRA                                                                 | Seedmatch       | 1              | F                |
| Covus Pro                                                               | Seedmatch       | 1              | R                |
| ERDBÄR                                                                  | Seedmatch       | 1              | T                |
| ROOMSURFER                                                              | Seedmatch       | 0              | F                |
| Cloud & Heat 2                                                          | Seedmatch       | 0              | R                |
| SAUSTARK DESIGN 2                                                       | Seedmatch       | 0              | T                |
| Tiere in Not Brauchen Freunde                                           | Socialfunders   | 1              | F                |
| Tiergestützte Therapie                                                  | Socialfunders   | 1              | R                |
| Arcus asbl                                                              | Socialfunders   | 1              | T                |
| Stiftung Zukunft schenken                                               | Socialfunders   | 0              | F                |
| Ein E-bike für die Pflege                                               | Socialfunders   | 0              | R                |
| Förderverein Grundschule Moselweiss                                     | Socialfunders   | 0              | T                |
| iCrane                                                                  | StartNext       | 1              | F                |
| Freifeld Festival 2013                                                  | StartNext       | 1              | R                |
| karma chakhs                                                            | StartNext       | 1              | T                |
| st_ry. deine doku.                                                      | StartNext       | 0              | F                |
| Berlin mal anders - Die Postkartenrevolution                            | StartNext       | 0              | R                |
| ice2go Eiskalt geniessen                                                | StartNext       | 0              | T                |
| Geschichten hinter vergessenen Mauern - Lost Place Dokumentarfilm       | Visionbakery    | 1              | F                |
| Postindustriale - Ausstellung und Reflexionen zum Thema Industriekultur | Visionbakery    | 1              | R                |
| Schokolade RUM fahren                                                   | Visionbakery    | 1              | T                |
| U.F.O.-Kurzfilmfestival 2013 (Leipzig)                                  | Visionbakery    | 0              | F                |
| Backstage – Serie                                                       | Visionbakery    | 0              | R                |
| La Corniche                                                             | Visionbakery    | 0              | T                |

F = Featured Project; R = Recent Project; T = Typical Project.

## Online Appendix 2. Construct Validation.

To explore the structure of our hedonic signal measure, we apply exploratory and confirmatory factor analysis. We start with modelling a “three factor model” in which we identify the three factors of entertainment, arousal, and imagination. Cronbach’s alphas ( $> 0.7$ ) and individual item reliabilities suggest a good reliability and the factors show convergent validity in terms of composite reliability (CR) and average variance explained (AVE) whose values should surpass the thresholds of 0.5 (Bagozzi and Yi 1988). To test for discriminant validity, we follow Fornell and Larcker (1981), who claim that the square root of one factor’s AVE should be higher than its correlations with every other factor. However, the three factors are highly correlated—all correlation coefficients are above 0.8—such that discriminant validity cannot be assumed.

Thus, we test a series of alternative measurement models (see Figure A1). First, we model hedonic signal strength as a “single factor model” that subsumes all items. Exploratory factor analysis shows that all items load on a single factor and the other validity and reliability measures from the confirmatory factor analysis are satisfactory (see Table A2). To compare among these different measurement models for representing our hedonic signal measure, we investigate various fit measures: the Tucker-Lewis-Index (TLI; should be  $> 0.95$ ), the Comparative-Fit-Index (CFI;  $> 0.95$ ), the Root-Mean-Square-Error of Approximation (RMSEA;  $< 0.08$ ), and the Standardized-Root-Mean-Square-Residual (SRMR;  $< 0.08$ ) (Hu and Bentler 1999; MacCallum et al. 1996). However, these measures indicate that the single factor model shows inappropriate fit to the data (see Table A3). Thus, we test two approaches that can reflect an overarching hedonic signal factor. We test a “second-order model” in which we model the three first-order factors of entertainment, arousal, and imagination that form hedonic signals as a second order factor.<sup>1</sup> Further, we model hedonic signals as a “bifactor model” that assumes that all items are forming a general hedonic signal factor that accounts for the common variance among these items (Reise 2012).

---

<sup>1</sup>A second-order factor with three first-order factors is just identified. Thus, it cannot be tested whether the second-order factor fits the data better than the model with three first-order factors without imposing additional constraints to the model. In so doing, we model that the effect of the three first-order factors on the second-order factor is identical.

Additionally, the items load on specific group factors, e.g., arousal, that model additional common variance among the items forming these constructs that is not shared by the general factor (Reise 2012). Comparing these models suggests that bifactor represents our data best. Likelihood-Ratio-Tests confirm that bifactor fits the data better than all other models ( $p < 0.01$ ).

**Figure A1.** Tested Measurement Models.

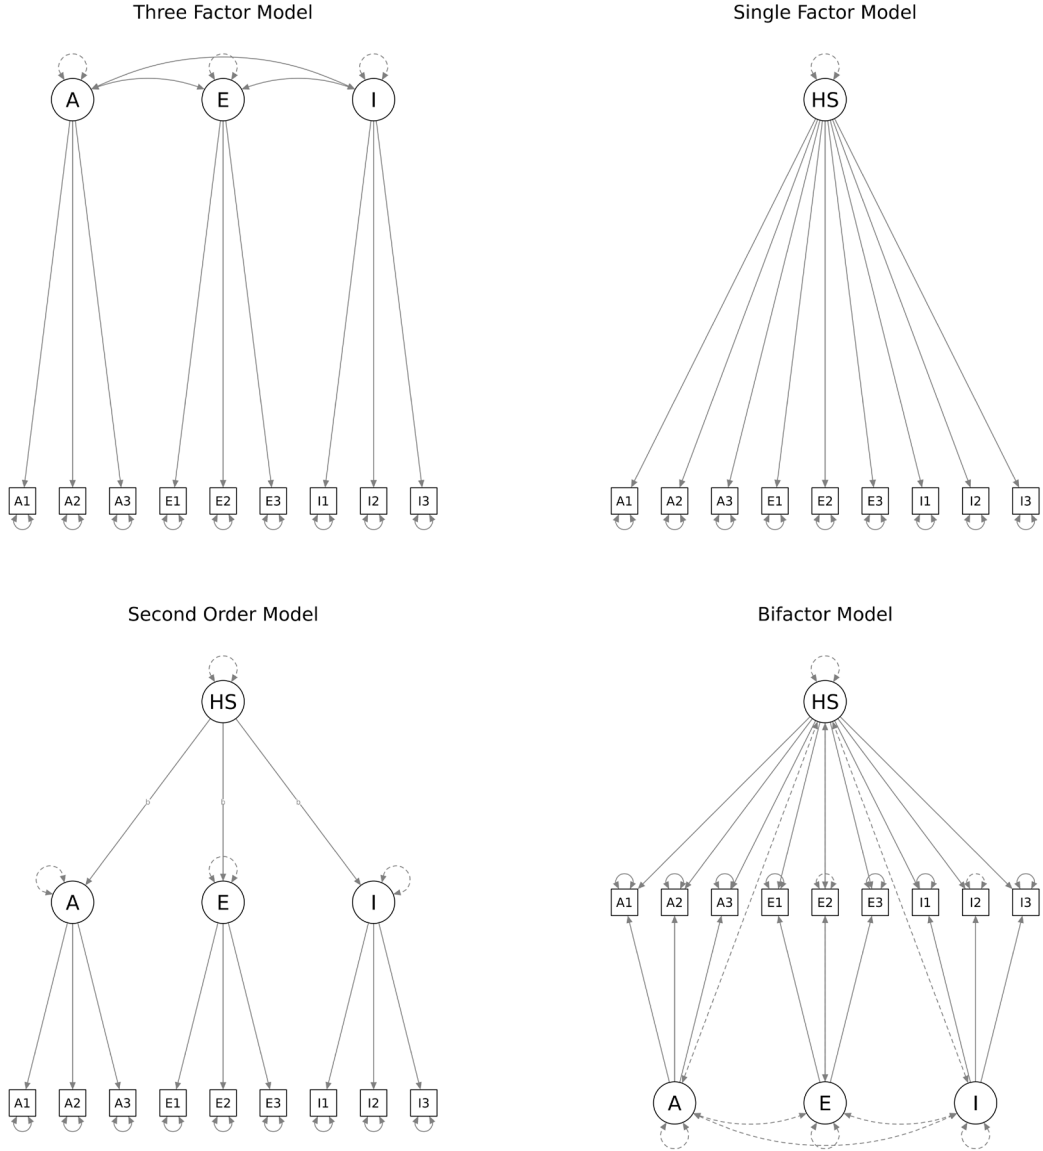

HS = Hedonic Signal; A = Arousal; E = Entertainment; I = Imagination.

**Table A2.** Exploratory and Confirmatory Factor Analysis for Single and Three Factor Model.

| Variable                                                                               | ICC   | Single Factor Model |                                         | Three Factor Model |              |              |              |
|----------------------------------------------------------------------------------------|-------|---------------------|-----------------------------------------|--------------------|--------------|--------------|--------------|
|                                                                                        |       | HS                  | Measures                                | I                  | E            | A            | Measures     |
| I2: The project creates a varied and diverse fantasy of participating.                 | 0.909 | <b>0.850</b>        | Alpha: 0.938<br>AVE: 0.630<br>CR: 0.939 | <b>0.834</b>       | 0.337        | 0.279        | Alpha: 0.879 |
| I1: The project has an interesting story that creates the fantasy of being part of it. | 0.946 | <b>0.835</b>        |                                         | <b>0.788</b>       | 0.246        | 0.399        | AVE: 0.726   |
| I3: The project makes the crowd feel as being part of the project team.                | 0.786 | <b>0.780</b>        |                                         | <b>0.711</b>       | 0.384        | 0.235        | CR: 0.887    |
| E2: The project gives a great pleasure.                                                | 0.747 | <b>0.834</b>        |                                         | 0.329              | <b>0.860</b> | 0.244        | Alpha: 0.897 |
| E3: The project creates a strong sense of enjoyment.                                   | 0.905 | <b>0.784</b>        |                                         | 0.294              | <b>0.852</b> | 0.201        | AVE: 0.757   |
| E1: The project is entertaining.                                                       | 0.932 | <b>0.867</b>        |                                         | 0.370              | <b>0.629</b> | 0.507        | CR: 0.904    |
| A1: The project is emotional.                                                          | 0.970 | <b>0.724</b>        |                                         | 0.240              | 0.153        | <b>0.898</b> | Alpha: 0.864 |
| A3: The project is activating and emotionally arousing.                                | 0.937 | <b>0.854</b>        |                                         | 0.391              | 0.386        | <b>0.721</b> | AVE: 0.681   |
| A2: The project is exciting.                                                           | 0.929 | <b>0.837</b>        |                                         | 0.446              | 0.443        | <b>0.568</b> | CR: 0.866    |
| Eigenvalues                                                                            |       | 6.041               |                                         | 2.564              | 2.551        | 2.298        |              |
| Variance Explained in %                                                                |       | 0.671               | 0.285                                   | 0.283              | 0.255        |              |              |

N=384; Single Factor Model: Measure of Sampling Adequacy= 0.901; Bartlett's test of specificity:  $\chi^2 = 164.6$ ,  $p = 0.000$ ; Three Factor Model: Measure of Sampling Adequacy= 0.901; Bartlett's test of specificity:  $\chi^2 = 64.423$ ,  $p = 0.000$ ; principal component analysis; varimax rotation; bold values indicate the attribution of the variables to factors.

ICC = Intra Class Correlation; Alpha = Cronbach Alpha; AVE = Average Variance Explained; CR = Composite Reliability; HS = Hedonic Signal, I = Imagination; E = Entertainment, A = Arousal.

**Table A3.** Factor Loadings and Fit Measures for all Models.

| Variable       | Three Factor Model |         |         | Single Factor Model | Second Order Model |         |         |         | Bifactor Model |         |         |         |
|----------------|--------------------|---------|---------|---------------------|--------------------|---------|---------|---------|----------------|---------|---------|---------|
|                | A                  | E       | I       | HS                  | A                  | E       | I       | HS      | A              | E       | I       | HS      |
| A1             | 0.957**            |         |         | 0.883**             | 0.409**            |         |         |         | 0.418*         |         |         | 0.885** |
| A2             | 1.027**            |         |         | 0.992**             | 0.434**            |         |         |         | 0.137          |         |         | 0.999** |
| A3             | 1.109**            |         |         | 1.035**             | 0.475**            |         |         |         | 0.511*         |         |         | 1.044** |
| E1             |                    | 1.019** |         | 1.008**             |                    | 0.438** |         |         |                | 0.297** |         | 0.985** |
| E2             |                    | 1.070** |         | 0.941**             |                    | 0.453** |         |         |                | 0.752** |         | 0.879** |
| E3             |                    | 1.001** |         | 0.912**             |                    | 0.426** |         |         |                | 0.492** |         | 0.856** |
| I1             |                    |         | 1.149** | 1.061**             |                    |         | 0.488** |         |                |         | 0.390** | 1.038** |
| I2             |                    |         | 1.148** | 1.044**             |                    |         | 0.490** |         |                |         | 0.749** | 1.009** |
| I3             |                    |         | 0.943** | 0.939**             |                    |         | 0.403** |         |                |         | 0.214** | 0.917** |
| A              |                    |         |         |                     |                    |         |         | 2.124** |                |         |         |         |
| E              |                    |         |         |                     |                    |         |         | 2.124** |                |         |         |         |
| I              |                    |         |         |                     |                    |         |         | 2.124** |                |         |         |         |
| RMSEA (< 0.08) |                    | 0.109   |         | 0.161               |                    |         | 0.106   |         |                |         | 0.078   |         |
| TLI (> 0.95)   |                    | 0.905   |         | 0.803               |                    |         | 0.911   |         |                |         | 0.955   |         |
| CFI (> 0.95)   |                    | 0.937   |         | 0.853               |                    |         | 0.936   |         |                |         | 0.975   |         |
| SRMR (< 0.08)  |                    | 0.048   |         | 0.058               |                    |         | 0.048   |         |                |         | 0.027   |         |

N = 384; \*\* p ≤ 0.01; \* p ≤ 0.05; † ≤ 0.1; A = Arousal; E = Entertainment; I = Imagination; HS = Hedonic Signals; RMSEA = Root Mean Square Error of Approximation; TLI = Tucker-Lewis-Index; CFI = Comparative Fit Index; SRMR = Standardized-Root-Mean-Square-Residual.

## References

- Bagozzi RP, Yi Y (1988) On the evaluation of structural equation models. *J Acad Mark Sci* 16 (1):74-94. doi:<https://doi.org/10.1007/BF02723327>
- Fornell C, Larcker DF (1981) Evaluating structural equation models with unobservable variables and measurement error. *J Mark Res* 18 (1):39-50. doi:<https://doi.org/10.1177/002224378101800104>
- Hu L, Bentler PM (1999) Cutoff criteria for fit indices in covariance structure analysis: Conventional criteria versus new alternatives. *Struct Equ Modeling* 6 (1):1-55. doi:<https://doi.org/10.1080/10705519909540118>
- MacCallum RC, Browne MW, Sugawara HM (1996) Power analysis and determination of sample size for covariance structure modeling. *Psychol Methods* 1 (2):130-149. doi:<https://doi.org/10.1037/1082-989X.1.2.130>
- Reise SP (2012) The rediscovery of bifactor measurement models. *Multivar Behav Res* 47 (5):667-696. doi:<https://doi.org/10.1080/00273171.2012.715555>
